# Supplementary material
Source: Springer Nature journal article supplement (https://www.springermedizin.de/resource/supplementary/12891_2012_1731_MOESM1_ESM.pdf/9508422)

A

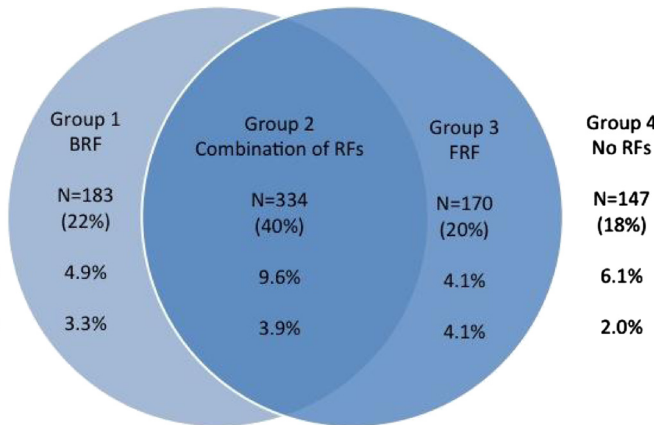

B

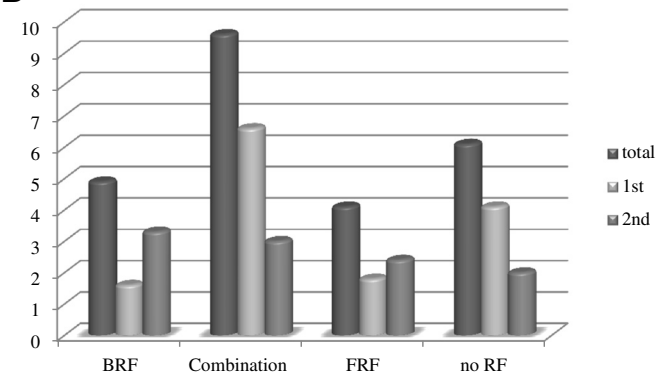

|                      | BRF | Combination | FRF | no RF |
|----------------------|-----|-------------|-----|-------|
| Total                | 9   | 32          | 7   | 9     |
| 1 <sup>st</sup> year | 3   | 22          | 3   | 6     |
| 2 <sup>nd</sup> year | 6   | 10          | 4   | 3     |

Supplement: MOESM1 [file 9508422]
